# Supplementary material
Source: PubMed Central journal article supplement (PMC6927500)
Supplement: ehp-127-117005-s001.pdf [file ehp-127-117005-s001.pdf]

**Note to readers with disabilities:** *EHP* strives to ensure that all journal content is accessible to all readers. However, some figures and Supplemental Material published in *EHP* articles may not conform to [508 standards](#) due to the complexity of the information being presented. If you need assistance accessing journal content, please contact [ehp508@niehs.nih.gov](mailto:ehp508@niehs.nih.gov). Our staff will work with you to assess and meet your accessibility needs within 3 working days.

### **Supplemental Material**

#### **Association between Heat Exposure and Hospitalization for Diabetes in Brazil during 2000–2015: A Nationwide Case-Crossover Study**

Rongbin Xu, Qi Zhao, Micheline S.Z.S. Coelho, Paulo H.N. Saldiva, Sophia Zoungas, Rachel R. Huxley, Michael J. Abramson, Yuming Guo, and Shanshan Li

#### **Table of Contents**

**Table S1.** ICD-10 codes of different types of diabetes mellitus with different complications.

**Table S2.** Comparison of daily mean temperature between case days and controls days that included in analyses.

**Table S3.** The association between heat exposure (every 5°C increase in daily mean temperature during the hot season) and diabetes hospitalization at lag0-3 days.

**Table S4.** The association between heat exposure (every 5°C increase in daily mean temperature during the hot season) and diabetes hospitalization, stratified by diabetes subtypes, and by sex, age, region, and complications.

**Table S5.** Results of sensitivity analysis by changing maximum lag of daily mean temperature from three to seven days and df of lag days from three to four.

**Table S6.** Results of sensitivity analysis by adjusting for relative humidity using data of 193 cities.

**Table S7.** Sensitivity analyses by changing the definition of hot season.

**Table S8.** The association between temperature and hospitalization for diabetes in different seasons.

**Figure S1.** Time-series plot of daily mean temperature in a selected city (São Joaquim) during the hot season between 2000 and 2015.

**Figure S2.** The linearity of the relationship between daily mean temperature during the hot seasons and diabetes hospitalization at the national level, modelled by a distributed lag non-linear model with nature cubic spline of  $df=3$  for both temperature and lag.

**Figure S3.** The lag pattern across 0-3 lag days of the association between heat exposure (every  $5^{\circ}\text{C}$  increase in daily mean temperature during the hot season) and diabetes hospitalization (odds ratios with 95% CI), stratified by sex and age group.

**Figure S4.** The lag pattern across 0-3 lag days of the association between heat exposure (every  $5^{\circ}\text{C}$  increase in daily mean temperature during the hot season) and diabetes hospitalization (odds ratios with 95% CI), stratified by regions.

**Figure S5.** The lag pattern across 0-3 lag days of the association between heat exposure (every  $5^{\circ}\text{C}$  increase in daily mean temperature during the hot season) and diabetes hospitalization (odds ratios with 95% CI), stratified by complications.

**Figure S6.** The association between heat exposure (every  $5^{\circ}\text{C}$  increase in daily mean temperature during the hot season) and diabetes hospitalization (odds ratios with 95% CI), stratified by diabetes subtype and by region.

**Figure S7.** The association between heat exposure (every  $5^{\circ}\text{C}$  increase in daily mean temperature during the hot season) and diabetes hospitalization (odds ratios with 95% CI), stratified by diabetes subtype and by complication.

**Table S1.** ICD-10 codes of different types of diabetes mellitus with different complications

|                                           | Type 1<br>diabetes<br>mellitus | Type 2<br>diabetes<br>mellitus | Malnutrition-<br>related<br>diabetes<br>mellitus | Other<br>specified<br>diabetes<br>mellitus | Unspecified<br>diabetes<br>mellitus |
|-------------------------------------------|--------------------------------|--------------------------------|--------------------------------------------------|--------------------------------------------|-------------------------------------|
| With coma                                 | E10.0                          | E11.0                          | E12.0                                            | E13.0                                      | E14.0                               |
| With ketoacidosis                         | E10.1                          | E11.1                          | E12.1                                            | E13.1                                      | E14.1                               |
| With renal complications                  | E10.2                          | E11.2                          | E12.2                                            | E13.2                                      | E14.2                               |
| With ophthalmic complications             | E10.3                          | E11.3                          | E12.3                                            | E13.3                                      | E14.3                               |
| With neurological complications           | E10.4                          | E11.4                          | E12.4                                            | E13.4                                      | E14.4                               |
| With peripheral circulatory complications | E10.5                          | E11.5                          | E12.5                                            | E13.5                                      | E14.5                               |
| With other specified complications        | E10.6                          | E11.6                          | E12.6                                            | E13.6                                      | E14.6                               |
| With multiple complications               | E10.7                          | E11.7                          | E12.7                                            | E13.7                                      | E14.7                               |
| With unspecified complications            | E10.8                          | E11.8                          | E12.8                                            | E13.8                                      | E14.8                               |
| Without complications                     | E10.9                          | E11.9                          | E12.9                                            | E13.9                                      | E14.9                               |

Note: See <https://icd.who.int/browse10/2016/en> for detail

**Table S2.** Comparison of daily mean temperature between case days and controls days that included in analyses

| Region       | Daily mean temperature (°C),<br>mean±sd |              | Student's t-test. |         |
|--------------|-----------------------------------------|--------------|-------------------|---------|
|              | Case days                               | Control days | t                 | P-value |
| North        | 28.15±1.52                              | 28.13±1.52   | 1.62              | 0.104   |
| Northeast    | 27.35±1.84                              | 27.33±1.84   | 2.39              | 0.017   |
| Central west | 25.74±2.45                              | 25.70±2.47   | 3.75              | <0.001  |
| Southeast    | 24.62±2.30                              | 24.57±2.32   | 8.73              | <0.001  |
| South        | 23.85±2.64                              | 23.78±2.66   | 7.21              | <0.001  |
| Overall      | 25.44±2.65                              | 25.40±2.67   | 9.51              | <0.001  |

Note: sd, standard deviation.

**Table S3.** The association between heat exposure (every 5°C increase in daily mean temperature during the hot season) and diabetes hospitalization at lag0-3 days

| Subgroup                             | Odds ratio (95% CI) at different lag days |                   |                   |                   |
|--------------------------------------|-------------------------------------------|-------------------|-------------------|-------------------|
|                                      | lag0                                      | lag1              | lag2              | lag3              |
| <b>Overall</b>                       | 1.08 (1.07, 1.10)                         | 1.01 (1.00, 1.02) | 0.98 (0.97, 0.99) | 0.99 (0.98, 1.00) |
| <b>Type of diabetes</b>              |                                           |                   |                   |                   |
| Type 1                               | 1.08 (1.06, 1.10)                         | 1.01 (1.00, 1.03) | 0.98 (0.97, 1.00) | 0.97 (0.95, 0.99) |
| Type 2                               | 1.07 (1.02, 1.11)                         | 1.01 (0.98, 1.05) | 0.99 (0.97, 1.02) | 1.00 (0.96, 1.04) |
| Malnutrition-related                 | 1.19 (1.08, 1.32)                         | 0.92 (0.85, 0.99) | 0.92 (0.86, 0.98) | 1.10 (1.00, 1.21) |
| Other specified                      | 1.08 (1.03, 1.13)                         | 1.03 (0.99, 1.07) | 1.00 (0.97, 1.03) | 0.99 (0.95, 1.03) |
| Unspecified                          | 1.08 (1.07, 1.10)                         | 1.00 (0.99, 1.01) | 0.98 (0.97, 0.99) | 0.99 (0.98, 1.01) |
| <b>Sex</b>                           |                                           |                   |                   |                   |
| Male                                 | 1.08 (1.06, 1.10)                         | 1.01 (1.00, 1.02) | 0.98 (0.97, 0.99) | 0.99 (0.97, 1.00) |
| Female                               | 1.09 (1.07, 1.11)                         | 1.00 (0.99, 1.02) | 0.98 (0.97, 0.99) | 0.99 (0.97, 1.01) |
| <b>Age group (years)</b>             |                                           |                   |                   |                   |
| 0~19                                 | 1.00 (0.96, 1.05)                         | 0.98 (0.95, 1.02) | 0.99 (0.96, 1.02) | 1.01 (0.97, 1.06) |
| 20~39                                | 1.03 (0.99, 1.06)                         | 0.96 (0.94, 0.99) | 0.97 (0.95, 0.99) | 1.02 (0.98, 1.05) |
| 40~59                                | 1.08 (1.06, 1.11)                         | 1.00 (0.98, 1.01) | 0.97 (0.96, 0.98) | 0.98 (0.96, 1.00) |
| 60~79                                | 1.10 (1.08, 1.12)                         | 1.02 (1.01, 1.04) | 0.99 (0.98, 1.00) | 0.98 (0.96, 0.99) |
| ≥80                                  | 1.13 (1.09, 1.18)                         | 1.03 (1.00, 1.07) | 1.00 (0.98, 1.03) | 1.01 (0.97, 1.04) |
| <b>Region</b>                        |                                           |                   |                   |                   |
| North                                | 1.08 (0.99, 1.18)                         | 1.03 (0.96, 1.09) | 0.99 (0.94, 1.05) | 0.97 (0.89, 1.05) |
| Northeast                            | 1.12 (1.08, 1.16)                         | 1.00 (0.97, 1.02) | 0.96 (0.94, 0.98) | 0.98 (0.95, 1.02) |
| Central west                         | 1.10 (1.06, 1.15)                         | 1.00 (0.98, 1.03) | 0.98 (0.96, 1.00) | 1.00 (0.97, 1.04) |
| Southeast                            | 1.08 (1.06, 1.09)                         | 1.01 (0.99, 1.02) | 0.98 (0.97, 0.99) | 0.99 (0.97, 1.00) |
| South                                | 1.08 (1.05, 1.10)                         | 1.01 (1.00, 1.03) | 0.99 (0.97, 1.00) | 0.98 (0.96, 1.00) |
| <b>Complications</b>                 |                                           |                   |                   |                   |
| Without complication                 | 1.12 (1.09, 1.15)                         | 1.00 (0.98, 1.02) | 0.97 (0.95, 0.99) | 1.00 (0.97, 1.02) |
| Coma                                 | 1.10 (1.05, 1.16)                         | 1.02 (0.99, 1.06) | 0.99 (0.96, 1.02) | 0.99 (0.95, 1.03) |
| Ketoacidosis                         | 1.05 (1.00, 1.09)                         | 1.00 (0.97, 1.03) | 0.98 (0.95, 1.00) | 0.98 (0.94, 1.02) |
| Peripheral circulatory complications | 1.04 (1.00, 1.07)                         | 1.00 (0.98, 1.03) | 1.00 (0.98, 1.03) | 1.03 (0.99, 1.06) |
| Other complications                  | 1.08 (1.06, 1.10)                         | 1.01 (1.00, 1.02) | 0.98 (0.97, 0.99) | 0.98 (0.97, 0.99) |
| With multiple complications          | 1.14 (1.06, 1.23)                         | 1.03 (0.98, 1.09) | 0.99 (0.94, 1.03) | 0.98 (0.92, 1.05) |

Notes: The odds ratios are for lag0-3 days and came from time-stratified case-crossover analyses modelled by conditional logistic regression with a cross-basis function for daily mean temperature. The model adjusted for public holiday. Hot season was the city-specific 4 adjacent hottest months and varied by city (e.g., Dec-Mar for São Paulo, Aug-Nov for Manaus).

**Table S4.** The association between heat exposure (every 5°C increase in daily mean temperature during the hot season) and diabetes hospitalization, stratified by diabetes subtypes, and by sex, age, region, and complications.

| Subgroups                            | Odds ratio (95% CI), by diabetes subtypes |                   |                                          |                   |
|--------------------------------------|-------------------------------------------|-------------------|------------------------------------------|-------------------|
|                                      | Type 1                                    | Type 2            | Malnutrition-related and other specified | Unspecified       |
| <b>Sex</b>                           |                                           |                   |                                          |                   |
| Female                               | 1.05 (1.02, 1.08)                         | 1.05 (0.99, 1.12) | 1.08 (1.01, 1.15)                        | 1.06 (1.03, 1.08) |
| Male                                 | 1.04 (1.01, 1.08)                         | 1.10 (1.03, 1.18) | 1.14 (1.06, 1.22)                        | 1.05 (1.02, 1.07) |
| <b>Age group (years)</b>             |                                           |                   |                                          |                   |
| 0~19                                 | 0.96 (0.89, 1.03)                         | 1.14 (0.89, 1.46) | 0.93 (0.75, 1.15)                        | 1.00 (0.93, 1.08) |
| 20~39                                | 0.95 (0.89, 1.01)                         | 0.95 (0.82, 1.10) | 1.08 (0.93, 1.25)                        | 0.98 (0.93, 1.03) |
| 40~59                                | 1.02 (0.98, 1.06)                         | 1.06 (0.98, 1.14) | 1.10 (1.02, 1.20)                        | 1.03 (1.00, 1.06) |
| 60~79                                | 1.12 (1.08, 1.16)                         | 1.11 (1.03, 1.19) | 1.12 (1.04, 1.20)                        | 1.06 (1.04, 1.09) |
| ≥80                                  | 1.10 (1.02, 1.19)                         | 1.07 (0.93, 1.25) | 1.15 (0.98, 1.35)                        | 1.25 (1.18, 1.32) |
| <b>Region</b>                        |                                           |                   |                                          |                   |
| North                                | 0.99 (0.78, 1.24)                         | 1.17 (0.82, 1.66) | 1.23 (0.91, 1.65)                        | 1.03 (0.88, 1.22) |
| Northeast                            | 1.07 (0.99, 1.16)                         | 1.17 (0.98, 1.39) | 1.13 (0.97, 1.33)                        | 1.02 (0.97, 1.08) |
| Central west                         | 1.09 (1.01, 1.17)                         | 1.21 (1.04, 1.41) | 1.05 (0.93, 1.19)                        | 1.08 (1.01, 1.15) |
| Southeast                            | 1.02 (0.99, 1.05)                         | 1.05 (0.99, 1.12) | 1.10 (1.02, 1.19)                        | 1.06 (1.04, 1.09) |
| South                                | 1.08 (1.04, 1.13)                         | 1.04 (0.95, 1.14) | 1.11 (1.03, 1.19)                        | 1.03 (1.00, 1.07) |
| <b>Complications</b>                 |                                           |                   |                                          |                   |
| Without complication                 | 1.07 (0.99, 1.15)                         | 0.99 (0.87, 1.12) | 1.14 (1.04, 1.25)                        | 1.08 (1.04, 1.12) |
| Coma                                 | 1.14 (1.08, 1.21)                         | 0.97 (0.79, 1.19) | 1.15 (0.85, 1.55)                        | 1.02 (0.91, 1.14) |
| Ketoacidosis                         | 0.97 (0.91, 1.03)                         | 0.95 (0.84, 1.09) | 1.16 (0.93, 1.43)                        | 1.07 (0.97, 1.17) |
| Peripheral circulatory complications | 1.05 (0.98, 1.12)                         | 1.16 (1.03, 1.31) | 1.03 (0.90, 1.18)                        | 1.08 (1.02, 1.14) |
| Other complications                  | 1.03 (1.00, 1.06)                         | 1.11 (1.04, 1.18) | 1.10 (1.03, 1.17)                        | 1.04 (1.02, 1.06) |
| With multiple complications          | 1.17 (1.05, 1.30)                         | 1.10 (0.92, 1.32) | 1.00 (0.68, 1.46)                        | 1.13 (0.97, 1.32) |

Notes: The odds ratios represent the cumulative association over lag0-3 days and came from time-stratified case-crossover analyses modelled by conditional logistic regression with a cross-basis function for daily mean temperature. The model adjusted for public holiday. Hot season was the city-specific 4 adjacent hottest months and varied by city (e.g., Dec-Mar for São Paulo, Aug-Nov for Manaus).

**Table S5.** Results of sensitivity analysis by changing maximum lag of daily mean temperature from three to seven days and df of lag days from three to four.

| Model                                         | Odds ratio (95% CI) | <i>p</i> -values for difference* |
|-----------------------------------------------|---------------------|----------------------------------|
| <b>All diabetes mellitus combined</b>         |                     |                                  |
| Primary                                       | 1.06(1.04, 1.07)    | Ref                              |
| Lag 0-4 days                                  | 1.05(1.04, 1.06)    | 0.517                            |
| Lag 0-5 days                                  | 1.04(1.03, 1.06)    | 0.258                            |
| Lag 0-6 days                                  | 1.04(1.02, 1.06)    | 0.118                            |
| Lag 0-7 days                                  | 1.03(1.01, 1.05)    | 0.024                            |
| Df of lag days = 4                            | 1.06(1.04, 1.07)    | 0.983                            |
| <b>Type 1 diabetes mellitus</b>               |                     |                                  |
| Primary                                       | 1.05(1.02, 1.07)    | Ref                              |
| Lag 0-4 days                                  | 1.04(1.01, 1.06)    | 0.402                            |
| Lag 0-5 days                                  | 1.03(1.01, 1.06)    | 0.161                            |
| Lag 0-6 days                                  | 1.03(1.01, 1.06)    | 0.503                            |
| Lag 0-7 days                                  | 1.03(1.00, 1.06)    | 0.477                            |
| Df of lag days = 4                            | 1.05(1.02, 1.07)    | 0.980                            |
| <b>Type 2 diabetes mellitus</b>               |                     |                                  |
| Primary                                       | 1.07(1.02, 1.12)    | Ref                              |
| Lag 0-4 days                                  | 1.07(1.02, 1.12)    | 0.395                            |
| Lag 0-5 days                                  | 1.05(1.00, 1.11)    | 0.139                            |
| Lag 0-6 days                                  | 1.05(0.99, 1.11)    | 0.575                            |
| Lag 0-7 days                                  | 1.05(0.99, 1.11)    | 0.525                            |
| Df of lag days = 4                            | 1.07(1.02, 1.12)    | 0.982                            |
| <b>Malnutrition-related diabetes mellitus</b> |                     |                                  |
| Primary                                       | 1.11(1.00, 1.24)    | Ref                              |
| Lag 0-4 days                                  | 1.11(0.98, 1.24)    | 0.394                            |
| Lag 0-5 days                                  | 1.10(0.97, 1.25)    | 0.138                            |
| Lag 0-6 days                                  | 1.08(0.94, 1.23)    | 0.711                            |
| Lag 0-7 days                                  | 1.05(0.91, 1.21)    | 0.493                            |
| Df of lag days = 4                            | 1.11(1.00, 1.24)    | 0.982                            |
| <b>Other specified diabetes mellitus</b>      |                     |                                  |
| Primary                                       | 1.10(1.04, 1.16)    | Ref                              |
| Lag 0-4 days                                  | 1.12(1.06, 1.18)    | 0.452                            |
| Lag 0-5 days                                  | 1.13(1.07, 1.20)    | 0.192                            |
| Lag 0-6 days                                  | 1.12(1.05, 1.19)    | 0.713                            |
| Lag 0-7 days                                  | 1.10(1.03, 1.17)    | 0.963                            |
| Df of lag days = 4                            | 1.10(1.04, 1.16)    | 0.983                            |
| <b>Unspecified diabetes mellitus</b>          |                     |                                  |
| Primary                                       | 1.05(1.04, 1.07)    | Ref                              |
| Lag 0-4 days                                  | 1.05(1.03, 1.07)    | 0.360                            |
| Lag 0-5 days                                  | 1.04(1.02, 1.06)    | 0.110                            |
| Lag 0-6 days                                  | 1.03(1.01, 1.05)    | 0.141                            |
| Lag 0-7 days                                  | 1.02(1.00, 1.04)    | 0.030                            |
| Df of lag days = 4                            | 1.05(1.03, 1.07)    | 0.976                            |

Note: Odds ratios represent the cumulative association between every 5°C increase in daily mean temperature over lag 0-3 days and diabetes hospitalization during hot season. The odds ratios came from time-stratified case-

crossover analyses modelled by conditional logistic regression with a cross-basis function for daily mean temperature. The model adjusted for public holiday. Hot season was the city-specific 4 adjacent hottest months and varied by city (e.g., Dec-Mar for São Paulo, Aug-Nov for Manaus). *p*-values for difference testing the difference between different models were estimated by meta-regression.

**Table S6.** Results of sensitivity analysis by adjusting for relative humidity using data of 193 cities.

| Model                                         | Odds ratio(95% CI) | <i>p</i> -value for difference* |
|-----------------------------------------------|--------------------|---------------------------------|
| <b>All diabetes mellitus combined</b>         |                    |                                 |
| Primary                                       | 1.03(1.01, 1.06)   | Ref                             |
| Adjusted for humidity                         | 1.03(1.00, 1.05)   | 0.751                           |
| <b>Type 1 diabetes mellitus</b>               |                    |                                 |
| Primary                                       | 1.03(0.99, 1.08)   | Ref                             |
| Adjusted for humidity                         | 1.03(0.98, 1.07)   | 0.696                           |
| <b>Type 2 diabetes mellitus</b>               |                    |                                 |
| Primary                                       | 1.04(0.95, 1.13)   | Ref                             |
| Adjusted for humidity                         | 1.03(0.95, 1.13)   | 0.694                           |
| <b>Malnutrition-related diabetes mellitus</b> |                    |                                 |
| Primary                                       | 0.99(0.78, 1.24)   | Ref                             |
| Adjusted for humidity                         | 0.97(0.77, 1.23)   | 0.690                           |
| <b>Other specified diabetes mellitus</b>      |                    |                                 |
| Primary                                       | 1.03(0.92, 1.15)   | Ref                             |
| Adjusted for humidity                         | 1.04(0.93, 1.16)   | 0.713                           |
| <b>Unspecified diabetes mellitus</b>          |                    |                                 |
| Primary                                       | 1.03(1.00, 1.06)   | Ref                             |
| Adjusted for humidity                         | 1.02(0.99, 1.06)   | 0.663                           |

Note: Odds ratios represent the cumulative association between every 5°C increase in daily mean temperature and diabetes hospitalization during the hot season. The odds ratios came from time-stratified case-crossover analyses modelled by conditional logistic regression with a cross-basis function for daily mean temperature. The model adjusted for public holiday and relative humidity. We adjusted for relative humidity by adding the average relative humidity in lag 0-3 days using natural cubic spline with three degrees of freedom (df=3). *P*-values testing the difference between different models were estimated by meta-regression. Hot season was the city-specific 4 adjacent hottest months and varied by city (e.g., Dec-Mar for São Paulo, Aug-Nov for Manaus).



**Table S7.** Sensitivity analyses by changing the definition of hot season

| Hot season definition     | No. of cases | Odds ratio (95%CI) | <i>p</i> -value for difference |
|---------------------------|--------------|--------------------|--------------------------------|
| 4 adjacent hottest months | 553,351      | 1.06 (1.04, 1.07)  | Ref                            |
| 5 adjacent hottest months | 689,272      | 1.05 (1.04, 1.06)  | 0.656                          |
| 6 adjacent hottest months | 827,232      | 1.05 (1.04, 1.06)  | 0.850                          |

Note: Odds ratios represent the cumulative association between every 5°C increase in daily mean temperature during the hot season and hospitalization for diabetes over lag 0-3 days. The odds ratios came from time-stratified case-crossover analyses modelled by conditional logistic regression with a cross-basis function for daily mean temperature. The model adjusted for public holiday. *p*-value for difference were estimated by meta-regression. The exact calendar months of hot season varied by city (e.g., Dec-Mar for São Paulo, Aug-Nov for Manaus, when using the first definition).

**Table S8.** The association between temperature and hospitalization for diabetes in different seasons.

| Season   | No. of cases | Odds ratio (95%CI) | <i>p</i> -value for difference |
|----------|--------------|--------------------|--------------------------------|
| Hot      | 553,351      | 1.06 (1.04, 1.07)  | Ref                            |
| Moderate | 551,446      | 1.04 (1.03, 1.05)  | 0.169                          |
| Cold     | 558,594      | 1.02 (1.01, 1.03)  | <0.001                         |

Note: Odds ratios represent the cumulative association between every 5°C increase in daily mean temperature and hospitalization for diabetes over lag0-3 days. The odds ratios came from time-stratified case-crossover analyses modelled by conditional logistic regression with a cross-basis function for daily mean temperature. The model adjusted for public holiday. *p*-value for difference were estimated by meta-regression. Hot season was the city-specific 4 adjacent hottest months and varied by city (e.g., Dec-Mar for São Paulo, Aug-Nov for Manaus); cold season was the city-specific 4 coldest months; the city-specific remained months were categorized as moderate season.

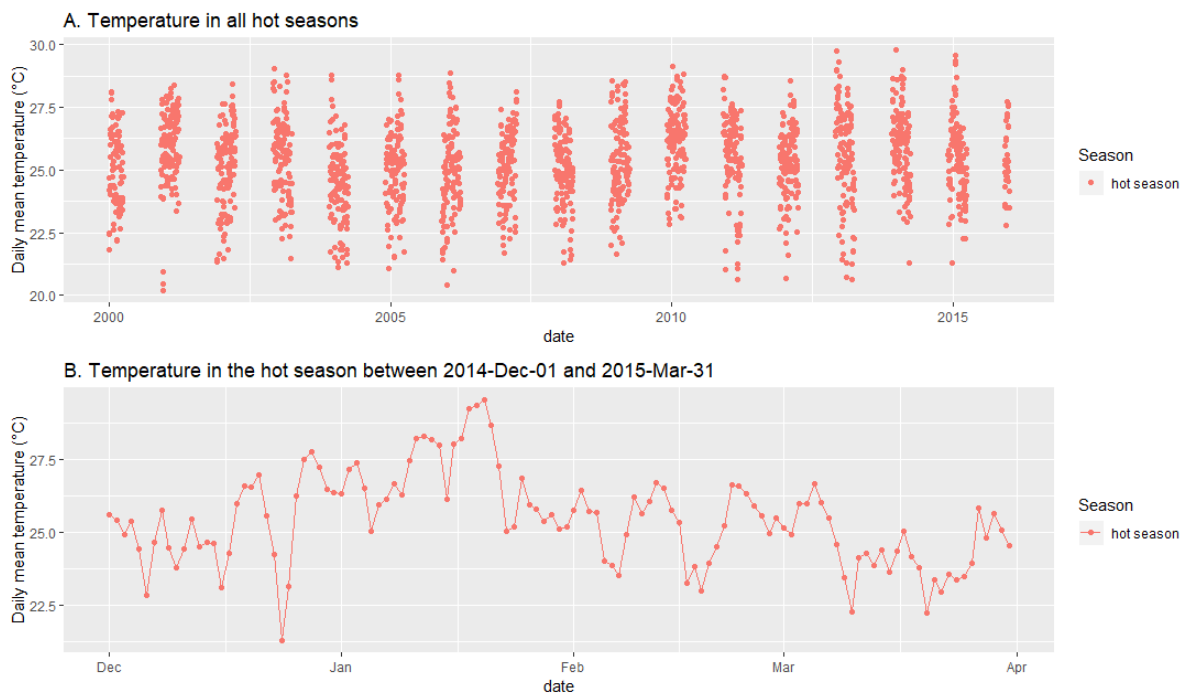

**Figure S1.** Time-series plot of daily mean temperature in a selected city (São Joaquim) during the hot season between 2000 and 2015.

Notes: the city (São Joaquim) selected for this figure is the city with median standard deviation of daily mean temperature during the study period. Hot season was defined as the city-specific adjacent four hottest months.

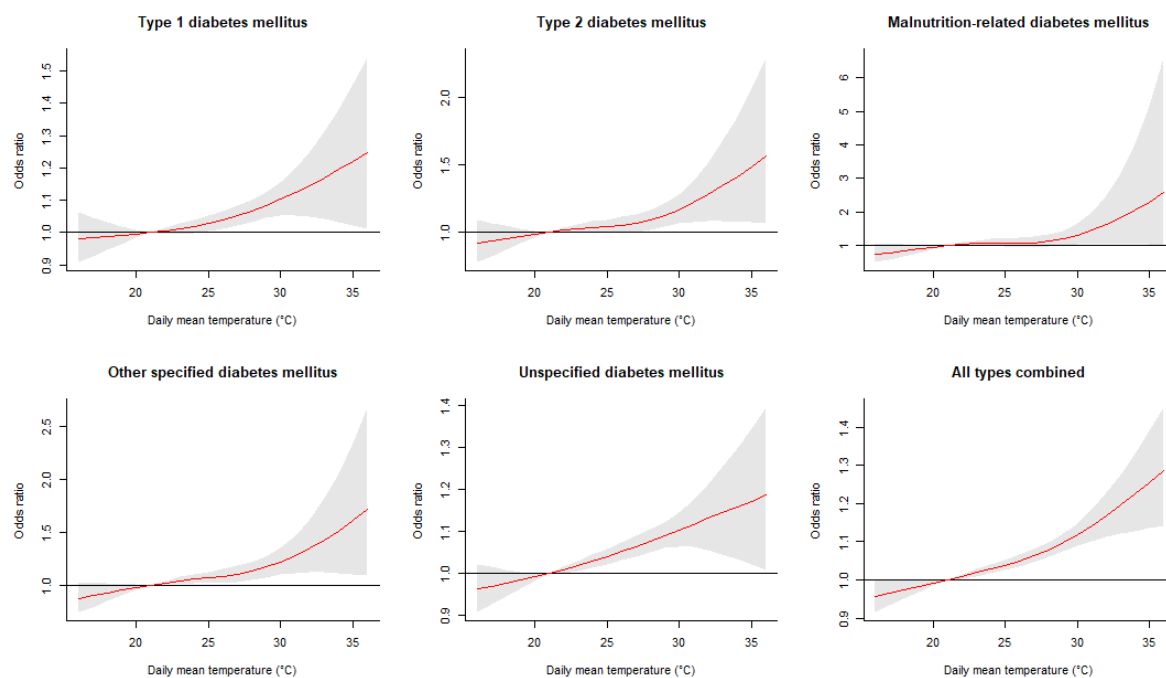

**Figure S2.** The linearity of the relationship between daily mean temperature during the hot seasons and diabetes hospitalization at the national level, modelled by a distributed lag non-linear model with nature cubic spline of  $df=3$  for both temperature and lag.

Notes: Hot season was defined as the city-specific adjacent four hottest months and varied by city (e.g., Dec-Mar for São Paulo, Aug-Nov for Manaus). The solid lines represent the point estimates of odds ratio, and the shaded areas represent the 95% confidence interval (CI).

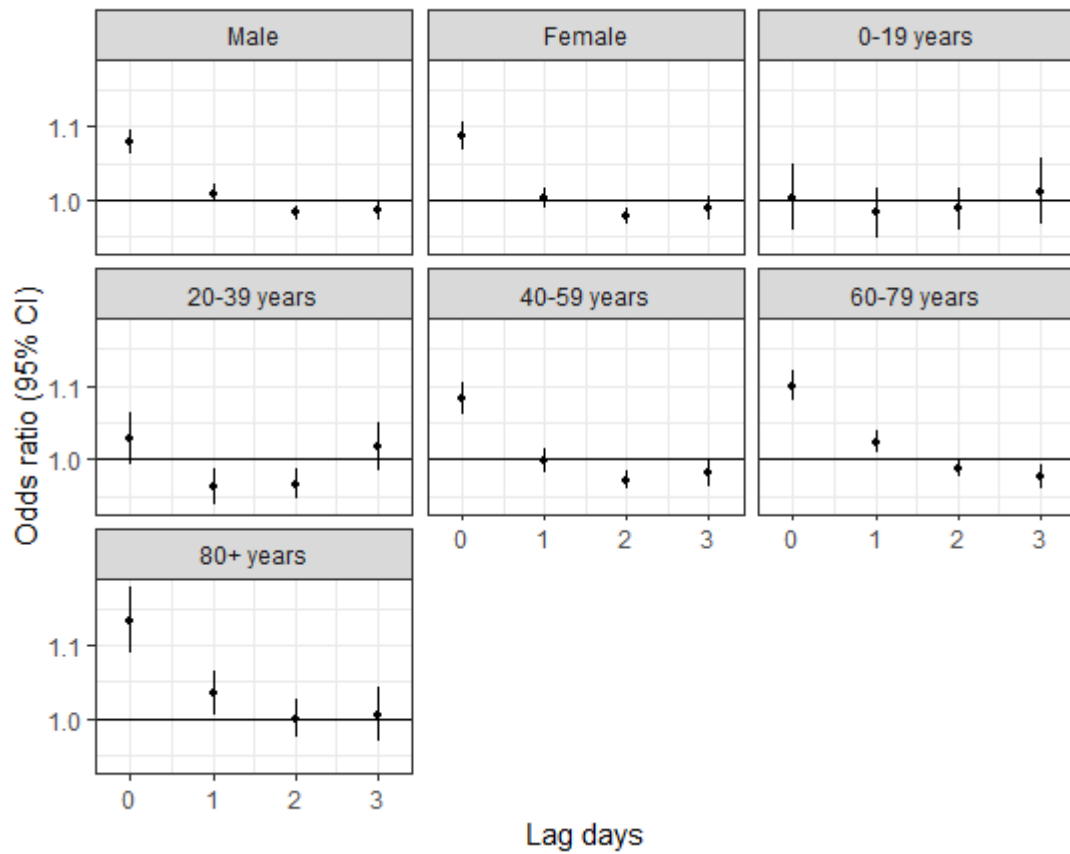

**Figure S3.** The lag pattern across 0-3 lag days of the association between heat exposure (every 5°C increase in daily mean temperature during the hot season) and diabetes hospitalization (odds ratios with 95% CI), stratified by sex and age group.

Notes: Hot season was defined as the city-specific adjacent four hottest months and varied by city (e.g., Dec-Mar for São Paulo, Aug-Nov for Manaus). The odds ratios were for lag0-3 days and came from time-stratified case-crossover analyses modelled by conditional logistic regression with a cross-basis function for daily mean temperature. The model adjusted for public holiday. Corresponding numeric data are provided in Table S3.

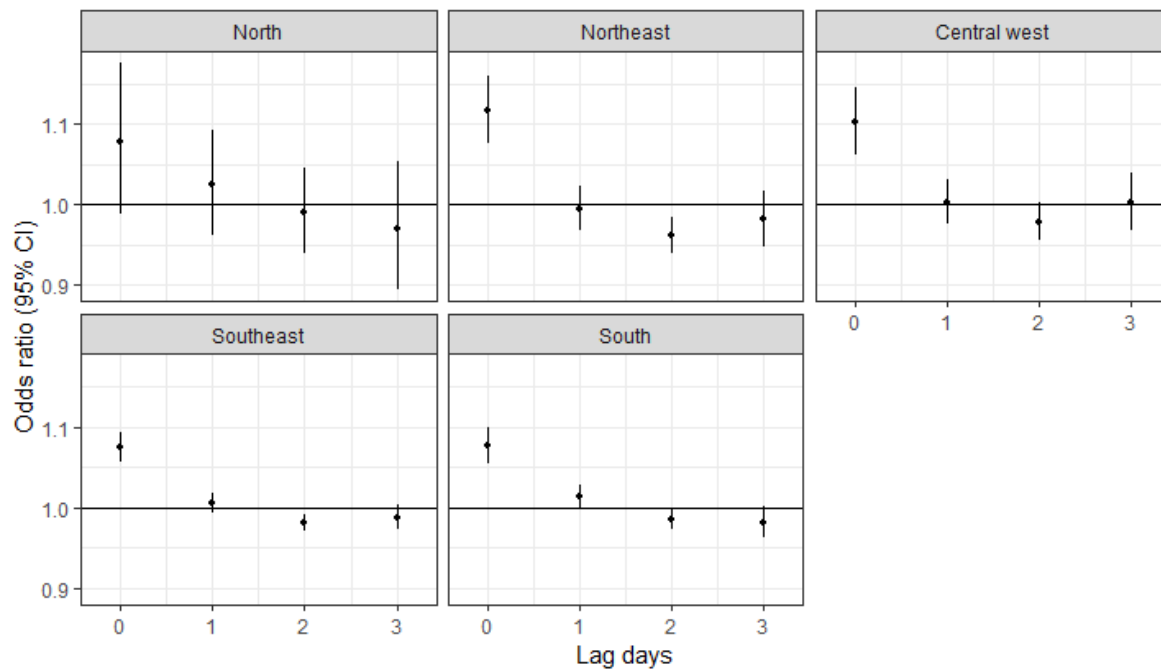

**Figure S4.** The lag pattern across 0-3 lag days of the association between heat exposure (every 5°C increase in daily mean temperature during the hot season) and diabetes hospitalization (odds ratios with 95% CI), stratified by regions.

Notes: Hot season was defined as the city-specific adjacent four hottest months and varied by city (e.g., Dec-Mar for São Paulo, Aug-Nov for Manaus). The odds ratios were for lag0-3 days and came from time-stratified case-crossover analyses modelled by conditional logistic regression with a cross-basis function for daily mean temperature. The model adjusted for public holiday. Corresponding numeric data are provided in Table S3.

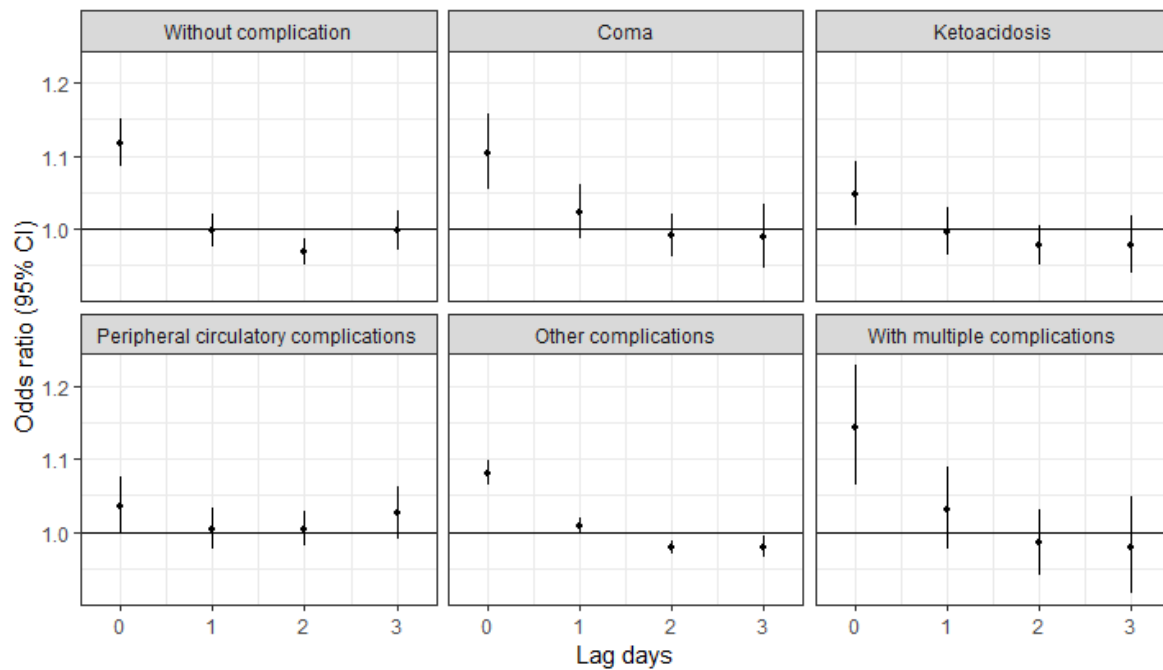

**Figure S5.** The lag pattern across 0-3 lag days of the association between heat exposure (every 5°C increase in daily mean temperature during the hot season) and diabetes hospitalization (odds ratios with 95% CI), stratified by complications.

Notes: Hot season was defined as the city-specific adjacent four hottest months and varied by city (e.g., Dec-Mar for São Paulo, Aug-Nov for Manaus). The odds ratios were for lag0-3 days and came from time-stratified case-crossover analyses modelled by conditional logistic regression with a cross-basis function for daily mean temperature. The model adjusted for public holiday. Corresponding numeric data are provided in Table S3.

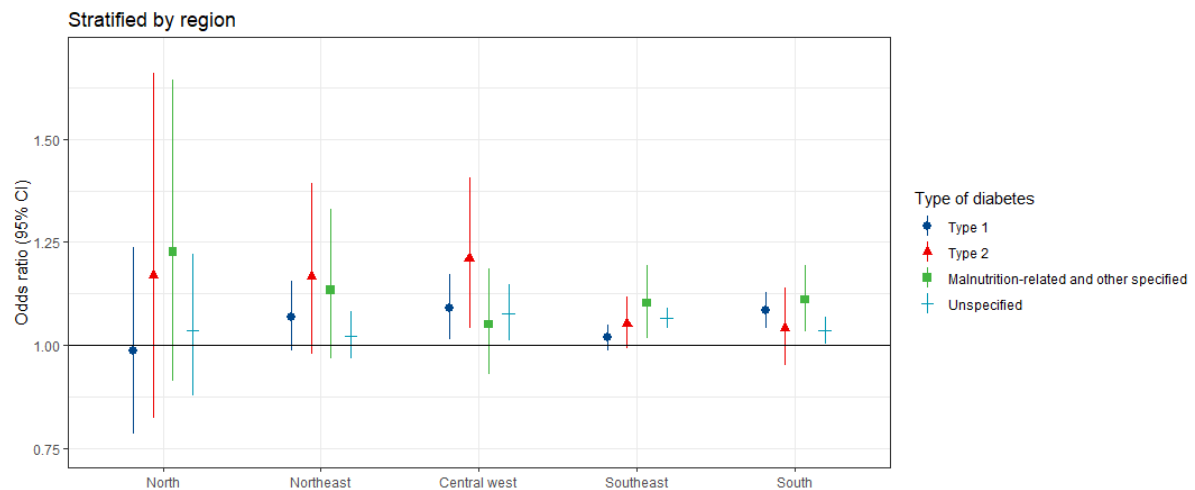

**Figure S6.** The association between heat exposure (every 5°C increase in daily mean temperature during the hot season) and diabetes hospitalization (odds ratios with 95% CI), stratified by diabetes subtype and by region.

Notes: Hot season was defined as the city-specific adjacent four hottest months and varied by city (e.g., Dec-Mar for São Paulo, Aug-Nov for Manaus). The odds ratios represent the cumulative associations over lag0-3 days and came from time-stratified case-crossover analyses modelled by conditional logistic regression with a cross-basis function for daily mean temperature. The model adjusted for public holiday. Corresponding numeric data are provided in Table S4.

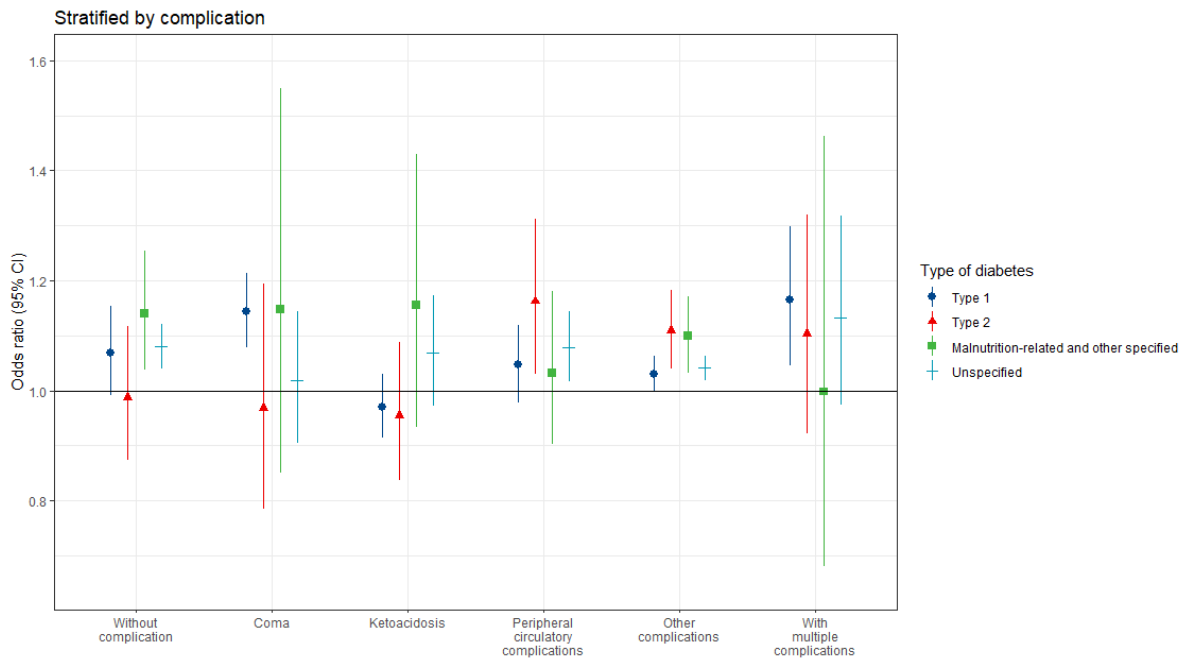

**Figure S7.** The association between heat exposure (every 5°C increase in daily mean temperature during the hot season) and diabetes hospitalization (odds ratios with 95% CI), stratified by diabetes subtype and by complication.

Notes: Hot season was defined as the city-specific adjacent four hottest months and varied by city (e.g., Dec-Mar for São Paulo, Aug-Nov for Manaus). The odds ratios represent the cumulative associations over lag0-3 days and came from time-stratified case-crossover analyses modelled by conditional logistic regression with a cross-basis function for daily mean temperature. The model adjusted for public holiday. Corresponding numeric data are provided in Table S4.
