# Supplementary material
Source: PubMed Central journal article supplement (PMC6927500)
Supplement: ehp-127-117005-s002.pdf [file ehp-127-117005-s002.pdf]

**Note to readers with disabilities:** *EHP* strives to ensure that all journal content is accessible to all readers. However, some figures and Supplemental Material published in *EHP* articles may not conform to [508 standards](#) due to the complexity of the information being presented. If you need assistance accessing journal content, please contact [ehp508@niehs.nih.gov](mailto:ehp508@niehs.nih.gov). Our staff will work with you to assess and meet your accessibility needs within 3 working days.

### **Supplemental Material**

#### **Association between Heat Exposure and Hospitalization for Diabetes in Brazil during 2000–2015: A Nationwide Case-Crossover Study**

Rongbin Xu, Qi Zhao, Micheline S.Z.S. Coelho, Paulo H.N. Saldiva, Sophia Zoungas, Rachel R. Huxley, Michael J. Abramson, Yuming Guo, and Shanshan Li

#### **Table of Contents**

**Table S1.** ICD-10 codes of different types of diabetes mellitus with different complications.

**Table S2.** Comparison of daily mean temperature between case days and controls days that included in analyses.

**Table S3.** The association between heat exposure (every 5°C increase in daily mean temperature during the hot season) and diabetes hospitalization at lag0-3 days.

**Table S4.** The association between heat exposure (every 5°C increase in daily mean temperature during the hot season) and diabetes hospitalization, stratified by diabetes subtypes, and by sex, age, region, and complications.

**Table S5.** Results of sensitivity analysis by changing maximum lag of daily mean temperature from three to seven days and df of lag days from three to four.

**Table S6.** Results of sensitivity analysis by adjusting for relative humidity using data of 193 cities.

**Table S7.** Sensitivity analyses by changing the definition of hot season.

**Table S8.** The association between temperature and hospitalization for diabetes in different seasons.

**Figure S1.** Time-series plot of daily mean temperature in a selected city (São Joaquim) during the hot season between 2000 and 2015.

**Figure S2.** The linearity of the relationship between daily mean temperature during the hot seasons and diabetes hospitalization at the national level, modelled by a distributed lag non-linear model with nature cubic spline of  $df=3$  for both temperature and lag.

**Figure S3.** The lag pattern across 0-3 lag days of the association between heat exposure (every  $5^{\circ}\text{C}$  increase in daily mean temperature during the hot season) and diabetes hospitalization (odds ratios with 95% CI), stratified by sex and age group.

**Figure S4.** The lag pattern across 0-3 lag days of the association between heat exposure (every  $5^{\circ}\text{C}$  increase in daily mean temperature during the hot season) and diabetes hospitalization (odds ratios with 95% CI), stratified by regions.

**Figure S5.** The lag pattern across 0-3 lag days of the association between heat exposure (every  $5^{\circ}\text{C}$  increase in daily mean temperature during the hot season) and diabetes hospitalization (odds ratios with 95% CI), stratified by complications.

**Figure S6.** The association between heat exposure (every  $5^{\circ}\text{C}$  increase in daily mean temperature during the hot season) and diabetes hospitalization (odds ratios with 95% CI), stratified by diabetes subtype and by region.

**Figure S7.** The association between heat exposure (every  $5^{\circ}\text{C}$  increase in daily mean temperature during the hot season) and diabetes hospitalization (odds ratios with 95% CI), stratified by diabetes subtype and by complication.
